# Supplementary material for: T Lymphocyte‐Derived Exosomes Transport MEK1/2 and ERK1/2 and Induce NOX4‐Dependent Oxidative Stress in Cardiac Microvascular Endothelial Cells
Source: Hindawi journal article supplement (doi:10.1155/2022/2457687), 2022-01-01

**A)**

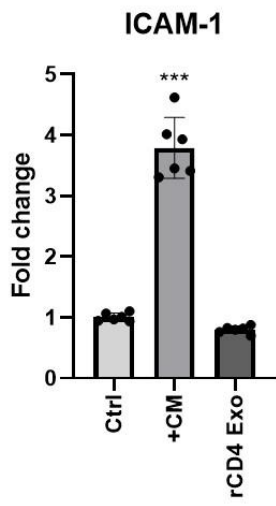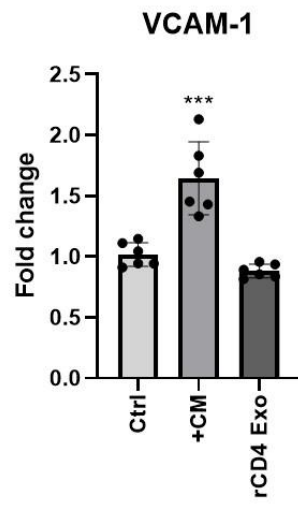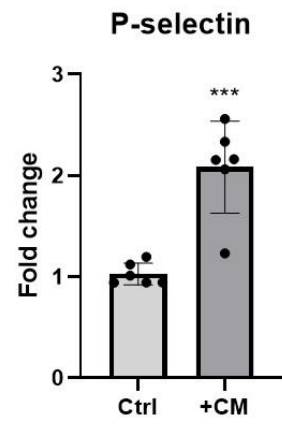

**B)**

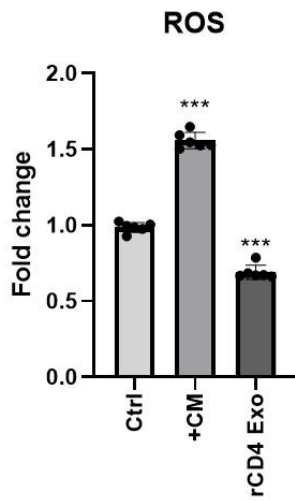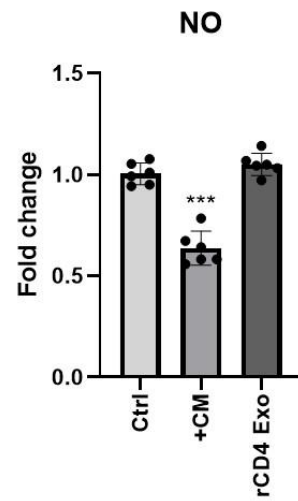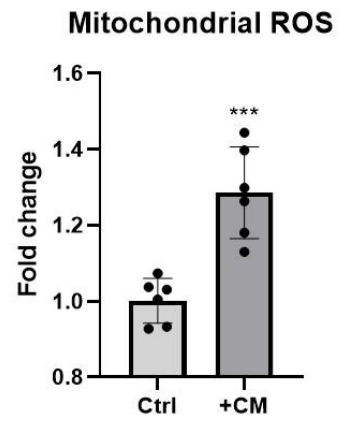

Supplement: f1 [file 2457687.f1.pdf]
